# Supplementary material for: Inhibition of a K9/K36 demethylase by an H3.3 point mutation found in paediatric glioblastoma
Source: PubMed Central journal article supplement (PMC6081460; doi:10.1038/s41467-018-05607-5), 2018-08-07
Supplement: 41467_2018_5607_MOESM1_ESM.pdf [file 41467_2018_5607_MOESM1_ESM.pdf]

## **Inhibition of a K9/K36 Demethylase by an H3.3 Point Mutation Found in Paediatric Glioblastoma**

Voon *et al.*

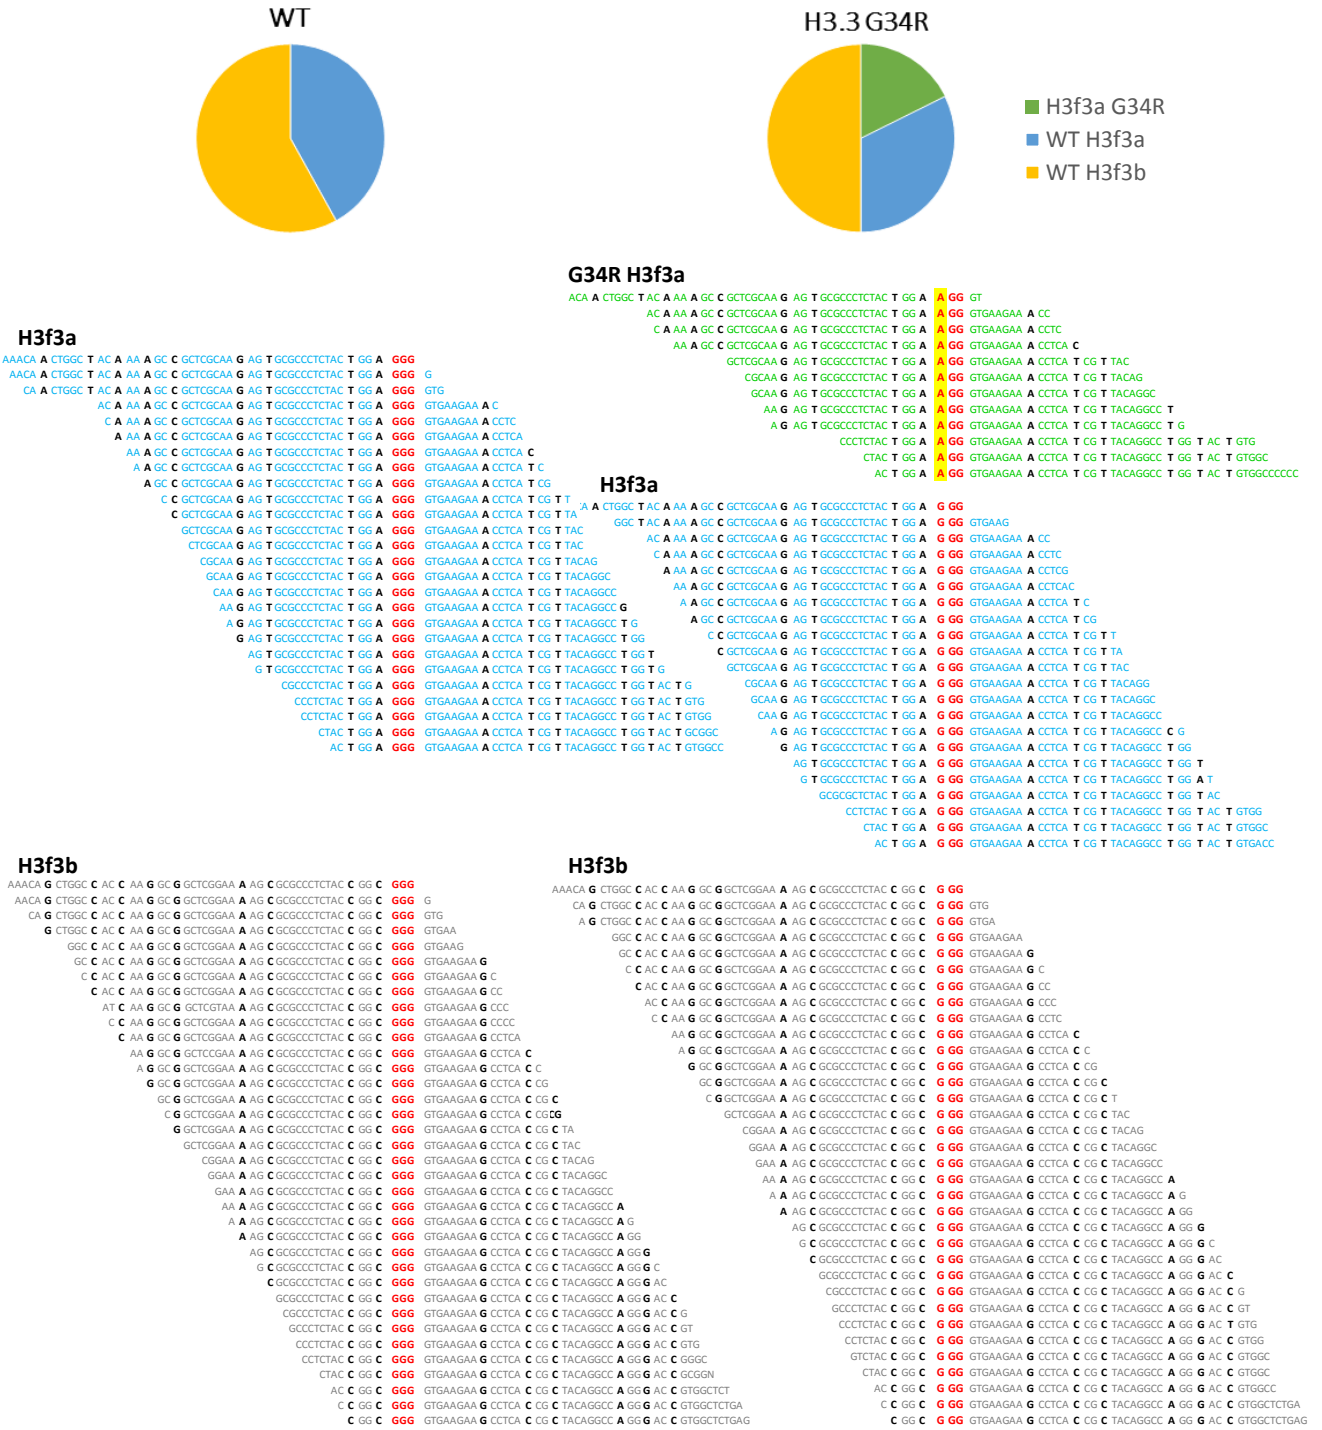

**Supplementary Figure 1.** RNA-sequencing reads from WT and G34R cells which span codon 34 of *H3f3a* and *H3f3b*. Green, blue and grey text indicate reads which map to *H3f3a* G34R, WT *H3f3a*, and WT *H3f3b* respectively. Bold black text indicate nucleotides which differentiate between *H3f3a* and *H3f3b*. Codon 34 is indicated in red in the glycine to arginine point mutation is highlighted in yellow.

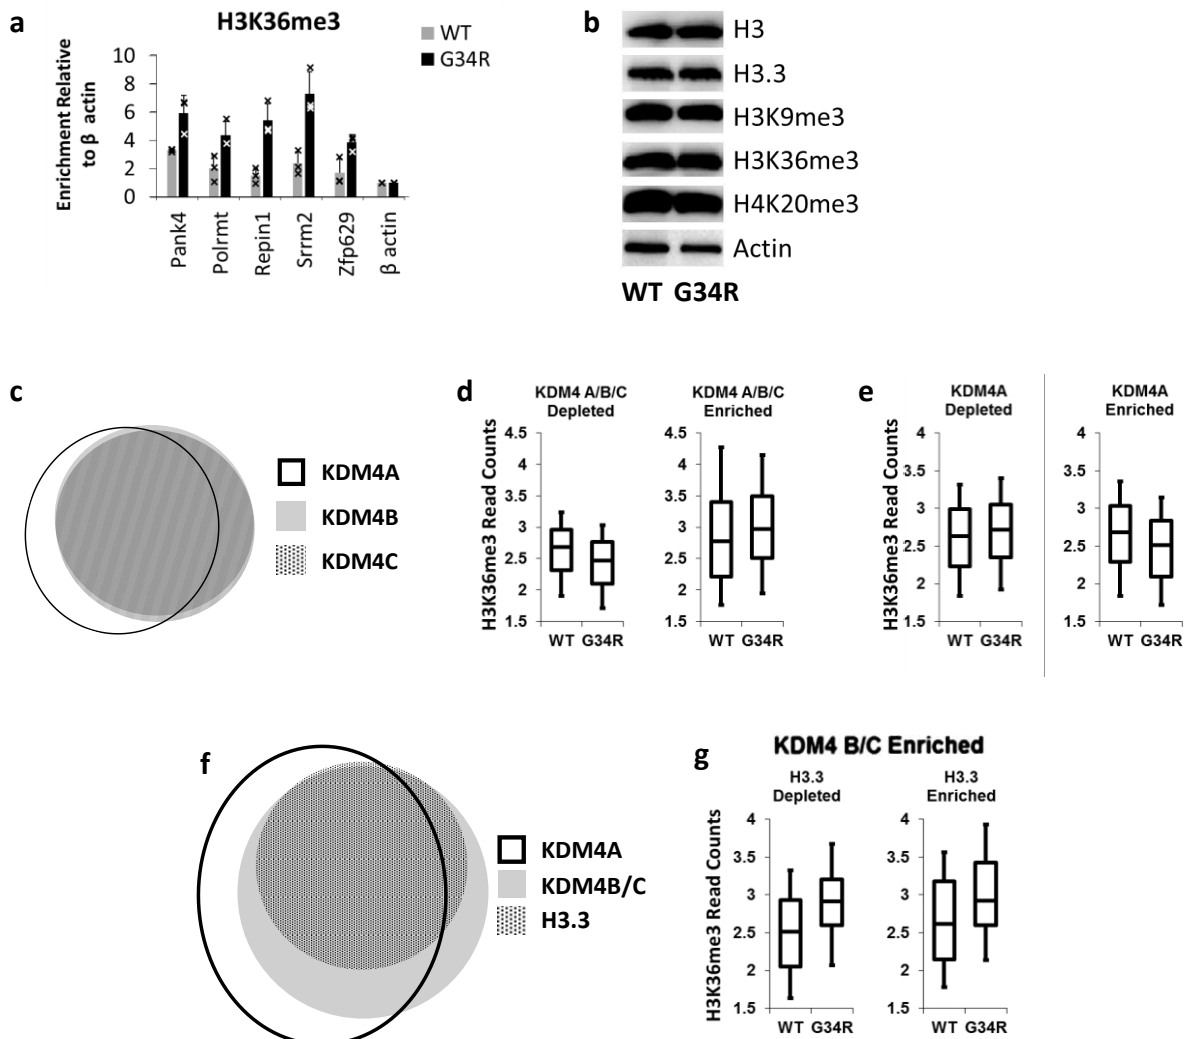

**Supplementary Figure 2.** (a) Dot plot overlay of H3K36me3 ChIP-qPCR in WT and G34R cells. (b) Western blot of whole cell extracts from WT and G34R cells. (c) Overlaps between KDM4 -A, -B, and -C at H3K36me3 enriched genomic regions. (d) Normalised H3K36me3 read counts from WT and G34R cells at KDM4 A/B/C depleted ( $n = 1957$ ) and enriched ( $n = 2596$ ) genomic regions. (e) Normalised H3K36me3 read counts from WT and G34R cells at KDM4A depleted ( $n = 8909$ ) and enriched ( $n = 778$ ) genomic regions. (f) Overlaps between KDM4A, KDM4 B/C, and H3.3 at H3K36me3 enriched genomic regions. (g) Normalised H3K36me3 read counts from WT and G34R cells at KDM4 B/C enriched sites which are depleted ( $n = 189$ ) or enriched ( $n = 120$ ) for H3.3. Boxes represent 25<sup>th</sup>, median and 75<sup>th</sup> percentile; whiskers represent 10<sup>th</sup> and 90<sup>th</sup> percentiles.

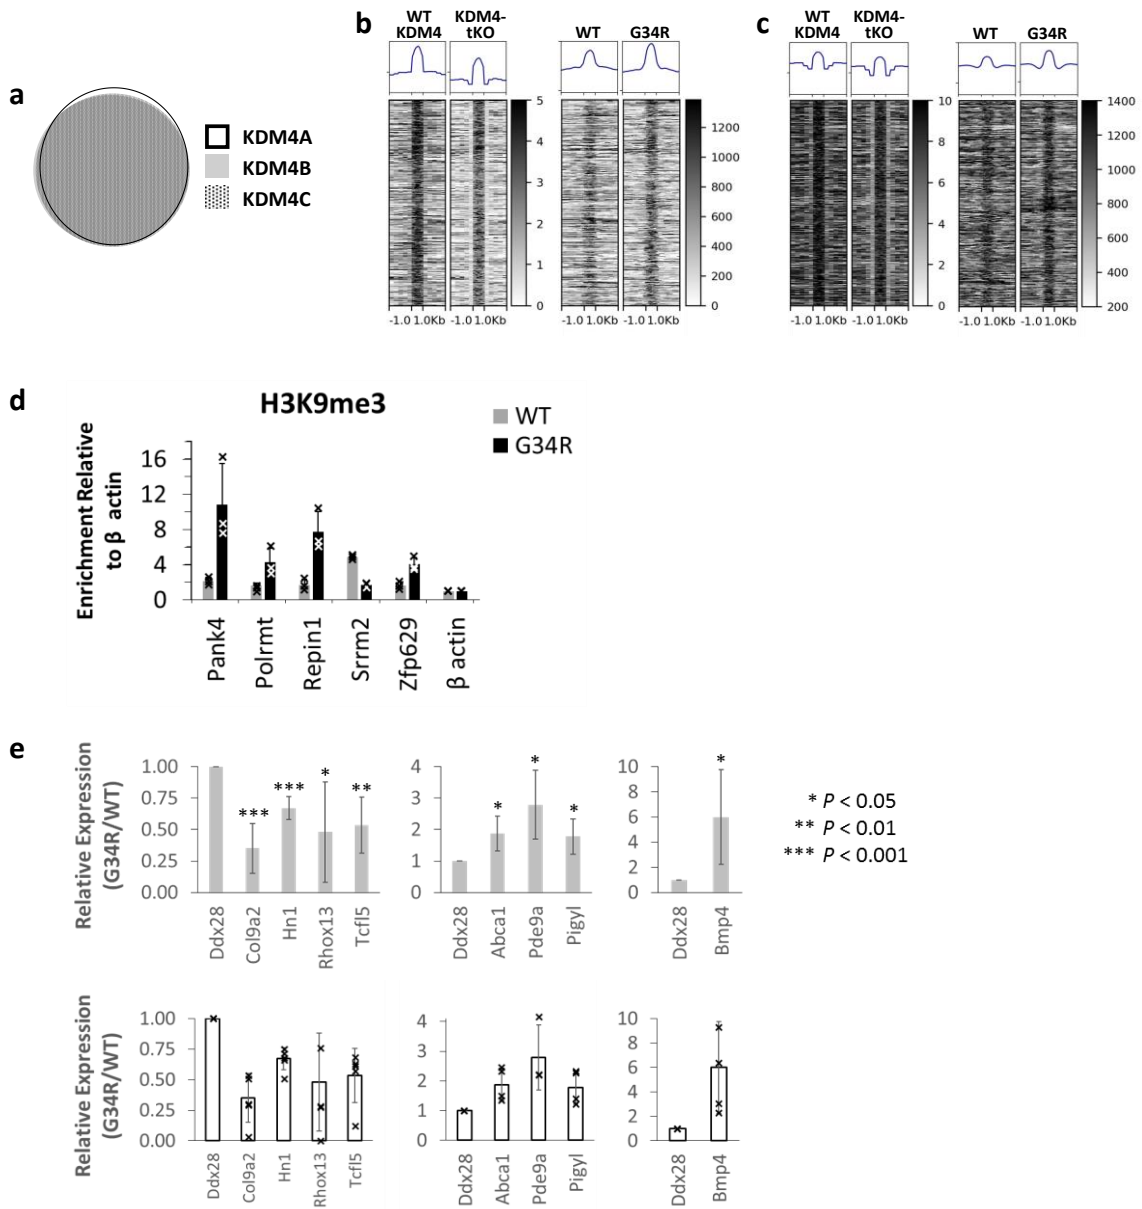

**Supplementary Figure 3. (a)** Overlaps between KDM4 -A, -B, and -C at H3K9me3 enriched genomic regions. **(b-c)** Heatmaps of **(b)** H3K9me3 ( $n = 932$ ) and **(c)** H3K36me3 ( $n = 5136$ ) ChIP-seq reads at sites where H3K9me3 or H3K36me3 is unchanged (0.8 - 1 fold) in KDM4-tKO mutants (+/- 1 kb) with profiles of corresponding regions in WT and G34R cells. **(d)** Dot plot overlay of H3K36me3 ChIP-qPCR in WT and G34R cells. **(e)** RT-qPCR of selected genes identified as down- or up-regulated in G34R cells relative to WT. Dot plot overlays are also shown. Bars represent mean values of G34R/WT expression calculated relative to an unchanged gene (Ddx28) ( $n = 3$ ). Error bars represent standard deviation of three independent experiments ( $n = 3$ ).  $P$ -values were calculated using Student's T-test (\* $P < 0.05$ , \*\* $P < 0.01$ , \*\*\* $P < 0.001$ ).

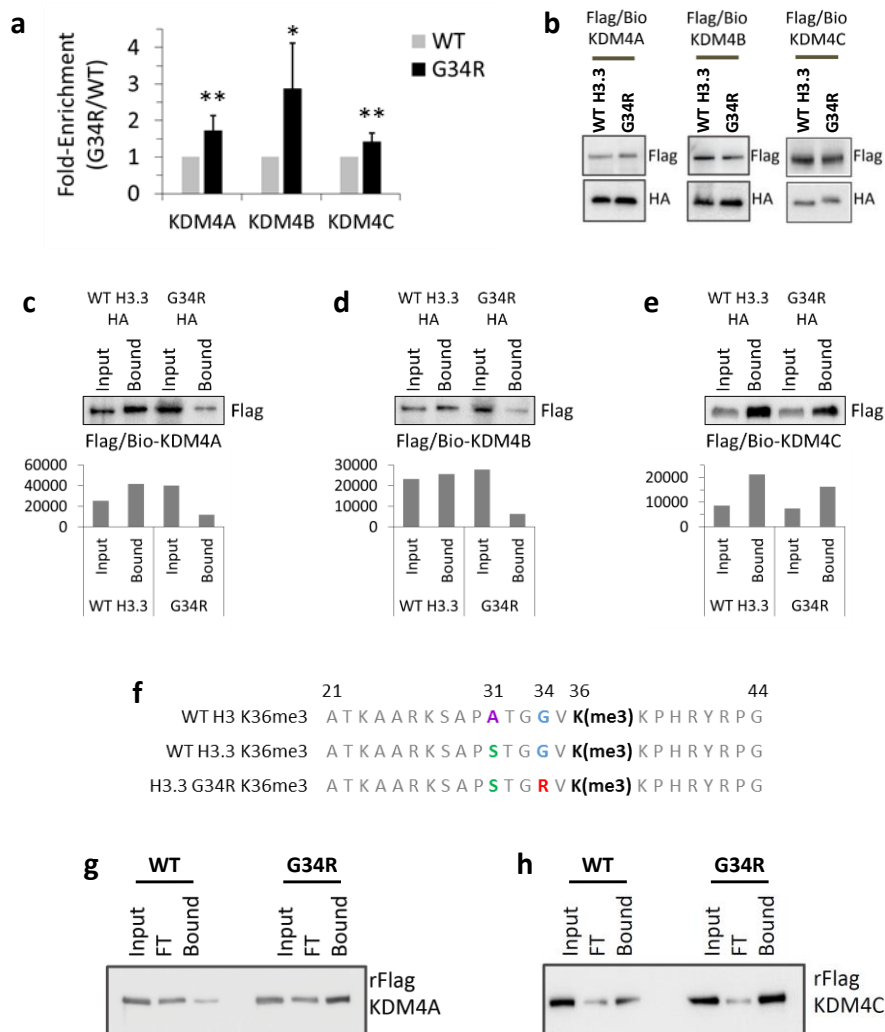

**Supplementary Figure 4.** (a-e) Co-transfection experiments of Flag/Biotin-tagged KDM4 -A, -B, and -C, with HA-tagged WT H3.3 or H3.3 G34R. (a) Quantitation of protein pulldowns of KDM4 -A -B, and -C, immunoblotted with anti-HA for detection of HA-tagged WT H3.3 and H3.3 G34R. Bars represent mean relative value of G34R/WT-H3.3 and error bars represent the standard deviation of three independent experiments ( $n = 3$ ).  $P$ -values were calculated using Student's T-test ( $*P < 0.05$ ,  $**P < 0.0005$ ). (b) Western blots with anti-Flag and anti-HA antibodies showing expression levels of KDM4 A/B/C and WT/G34R H3.3. (c-e) Immunoprecipitation of (c) KDM4A (d) KDM4B and (e) KDM4C immunoblotted with Anti-Flag for detection of KDM4. (f-h) *In vitro* binding assays of Flag-tagged KDM4 -A and -C with WT H3.3 K36me3 and H3.3 G34R K36me3 peptides. (f) Synthetic peptides used in assay with key amino acids indicated. Pulldown of (g) KDM4A and (h) KDM4C comparing interactions between WT H3.3 K36me3 and H3.3 G34R K36me3 peptides. FT = flowthrough.

HindIII digest; Probe 1

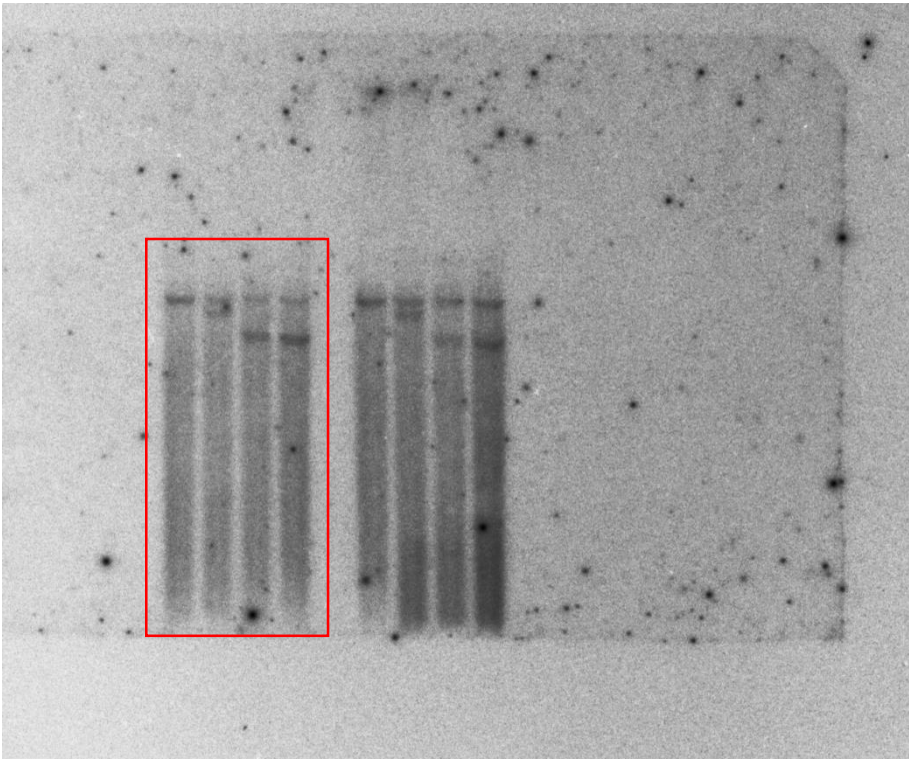

EcoRI digest; Probe 2

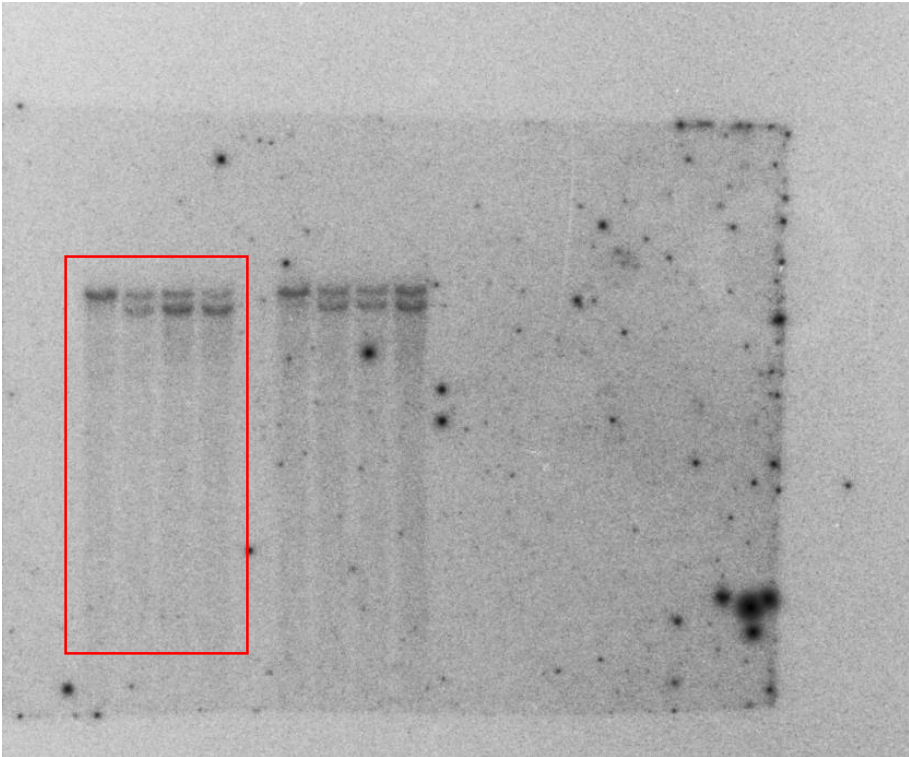

Supplementary Figure 5. Full blots of Figure 1b

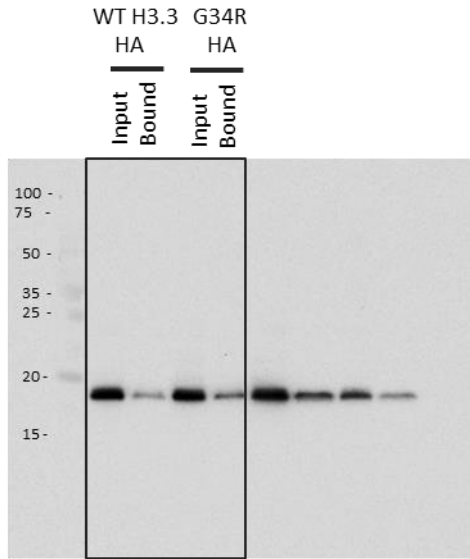

Flag/Bio-KDM4A

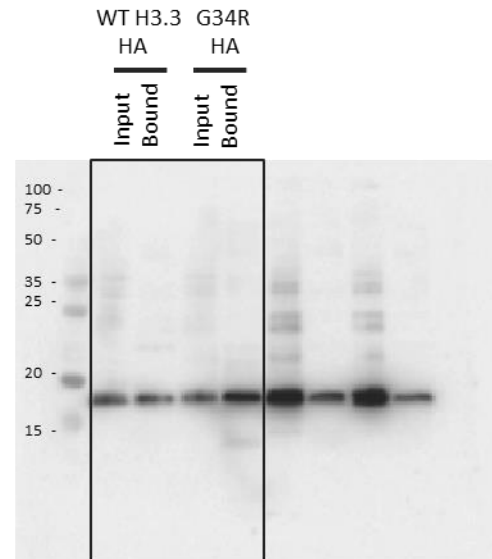

Flag/Bio-KDM4B

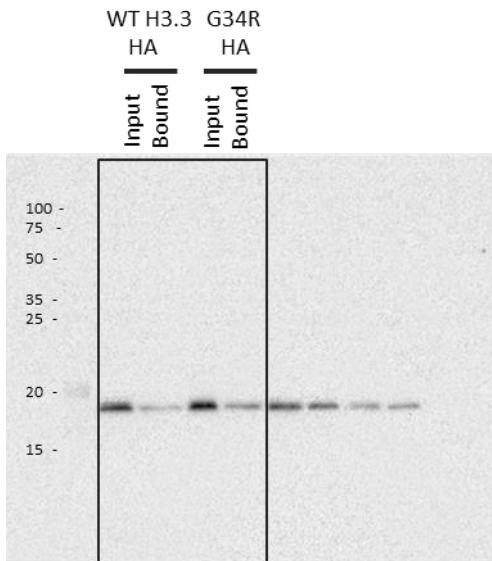

Flag/Bio-KDM4C

**Supplementary Figure 6.** Full blots of Figure 4a

**Supplementary Table 1.** List of PCR primers used in this study.

| <b>Primers for Southern Probes</b>   |                         |
|--------------------------------------|-------------------------|
| Probe 1 Fwd                          | ACCATGCTGGGCTCTTTAC     |
| Probe 1 Rev                          | AACTGTGCTAGGCACAGC      |
| Amplicon size – 295 bp               |                         |
| Probe 2 Fwd                          | ACTAGAAAAACCGCCAA       |
| Probe 2 Rev                          | GCATATACGGAGTCAGGGA     |
| Pank4_Rev                            | CTGCGTAGTTCTCACCCCAG    |
| Amplicon size – 306 bp               |                         |
| <b>Transgene Sequencing Primers</b>  |                         |
| Seq_Fwd                              | CTCATAGTGGACTCGCGGC     |
| Seq_Rev                              | GACGGCGCGTGAATTGGAT     |
| <b>ChIP-qPCR Primers</b>             |                         |
| Pank4_Fwd                            | TTTGAATCAAGGGCGAGGCT    |
| Pank4_Rev                            | CTGCGTAGTTCTCACCCCAG    |
| Polrmt_Fwd                           | CGGCCGCGGAAGTCCATGTT    |
| Polrmt_Rev                           | CGCAGCGAGGCCCTGTATCG    |
| Repin1_Fwd                           | GGAAGCGTTTCACCAACAAG    |
| Repin1_Rev                           | GCGACAACAGGTTGGTTTTG    |
| Srrm2_Fwd                            | CCTACCAAAGGTTCTCGGCA    |
| Srrm2_Rev                            | AAATCTCTCGACGGGACCCA    |
| Zfp629_Fwd                           | TTGGCTCCTGGTGGCGGAGT    |
| Zfp629_Rev                           | GCCCGGAGAGCTCAGGGTGA    |
| $\beta$ -actin_Fwd                   | ACACCCGCCACCAGGTAAGCA   |
| $\beta$ -actin_Rev                   | CCTGCAGTGAGGTAAGTCCACGA |
| <b>Zfp358 primers arranged 5'-3'</b> |                         |
| Zfp358_1_Fwd                         | AGCAACATCCAGAGTCCAGC    |
| Zfp358_1_Rev                         | ACTTTAAAGCCCCAGCTCCC    |
| Zfp358_2_Fwd                         | TTCCAAGAGATGATCGGGG     |
| Zfp358_2_Rev                         | GCAGCCTCATGAACTCCCAT    |
| Zfp358_3_Fwd                         | CCAGTCCTCTCTCCCAAGA     |
| Zfp358_3_Rev                         | AACTGCTTGCAGCTTCTGGA    |
| Zfp358_4_Fwd                         | GCAGAGTTCAGCACTCCTACAA  |
| Zfp358_4_Rev                         | ACAGAGCTGACAACGGTAGG    |
| Zfp358_5_Fwd                         | CCGGAAGAGTGCAGGTTTCA    |
| Zfp358_5_Rev                         | CCCACACTGCTACACAGGAT    |
| Zfp358_6_Fwd                         | TTGTCAGCTGCCATGTGGAT    |
| Zfp358_6_Rev                         | TGCATCAGTGAGGAGAAGTGG   |

| <b>Expression Primers</b> |                         |
|---------------------------|-------------------------|
| Abca1_Fwd                 | AGGACAGTGTTCCTCAGAGCAG  |
| Abca1_Rev                 | GAGACATCGATGGTCAGCGT    |
| Bmp4_Fwd                  | GCCCTCGACCAGGTTTCATTG   |
| Bmp4_Rev                  | GAATGGCTCCATTGGTTCTCTG  |
| Col9a2_Fwd                | AGGGAGTGCAGGATTTCTTGT   |
| Col9a2_Rev                | TGCCTGGATGACCCTTCACT    |
| Ddx28_Fwd                 | GTATTCTGCAACAGCGCCAG    |
| Ddx28_Rev                 | TTTGCCTTGCAGCCTTAGA     |
| Hn1_Fwd                   | CAGGGAAGATTCGGAGTCGC    |
| Hn1_Rev                   | TCACCTTCTCCCTTGAGGTCTA  |
| Pde9a_Fwd                 | GTGAAGCAAGTGTCTGAACGA   |
| Pde9a_Rev                 | TCGTTGATCTTAAACGCTCTGGA |
| Pigyl_Fwd                 | ACAGGCCTGCAAACGTTAAAA   |
| Pigyl_Rev                 | CAGCGTTACCAGCGACT       |
| Rhox13_Fwd                | CCCAGTACCCGGATTTGCTT    |
| Rhox13_Rev                | ACCACACCTTCACTTTGACCT   |
| Tcf15_Fwd                 | GAACGAGATAGGAGGCGCAG    |
| Tcf15_Rev                 | TCTCCGATTGCAGAATGGA     |



**Supplementary Table 2.** List of GEO datasets used in this study.

|                          | <b>Cell type</b>        | <b>GEO Accession</b> | <b>GEO Sample</b> | <b>Reference</b>           |
|--------------------------|-------------------------|----------------------|-------------------|----------------------------|
| <b>H3.3 ChIP-seq</b>     | WT                      | GSE59271             | GSM1432232        | Voon <i>et al.</i> (1)     |
| <b>KDM4a ChIP-seq</b>    | WT                      | GSE64252             | GSM2143305        | Pedersen <i>et al.</i> (2) |
| <b>KDM4b ChIP-seq</b>    | WT                      | GSE43231             | GSM1058995        | Das <i>et al.</i> (3)      |
| <b>KDM4c ChIP-seq</b>    | WT                      | GSE43231             | GSM1058996        | Das <i>et al.</i> (3)      |
| <b>H3K9me3 ChIP-seq</b>  | KDM4 A/B/C Flox Control | GSE64252             | GSM2143309        | Pedersen <i>et al.</i> (2) |
| <b>H3K9me3 ChIP-seq</b>  | KDM4-tKO (+OHT)         | GSE64252             | GSM2143310        | Pedersen <i>et al.</i> (2) |
| <b>H3K36me3 ChIP-seq</b> | KDM4 A/B/C Flox Control | GSE64252             | GSM2143317        | Pedersen <i>et al.</i> (2) |
| <b>H3K36me3 ChIP-seq</b> | KDM4-tKO (+OHT)         | GSE64252             | GSM2143318        | Pedersen <i>et al.</i> (2) |

## Supplementary References

1. H. P. Voon, J. R. Hughes, C. Rode, I. A. De La Rosa-Velazquez, T. Jenuwein *et al.*, ATRX Plays a Key Role in Maintaining Silencing at Interstitial Heterochromatic Loci and Imprinted Genes. *Cell reports* **11**, 405-418 (2015).
2. M. T. Pedersen, S. M. Kooistra, A. Radzisheuskaya, A. Laugesen, J. V. Johansen *et al.*, Continual removal of H3K9 promoter methylation by Jmjd2 demethylases is vital for ESC self-renewal and early development. *The EMBO journal* **35**, 1550-1564 (2016).
3. P. P. Das, Z. Shao, S. Beyaz, E. Apostolou, L. Pinello *et al.*, Distinct and combinatorial functions of Jmjd2b/Kdm4b and Jmjd2c/Kdm4c in mouse embryonic stem cell identity. *Molecular cell* **53**, 32-48 (2014).
