# Supplementary material for: Inhibition of a K9/K36 demethylase by an H3.3 point mutation found in paediatric glioblastoma
Source: PubMed Central journal article supplement (PMC6081460; doi:10.1038/s41467-018-05607-5), 2018-08-07
Supplement: 41467_2018_5607_MOESM3_ESM.pdf [file 41467_2018_5607_MOESM3_ESM.pdf]

## **Description of Additional Supplementary Files**

**File Name: Supplementary Data 1**

**Description:** List of genes which are down- or up- regulated in H3.3 G34R mutants relative to WT.
